# Supplementary material for: Outcome and Treatment Effects in Stroke Associated with Acute Cervical ICA Occlusion
Source: PubMed Central journal article supplement (PMC5231377; doi:10.1371/journal.pone.0170247), 2017-01-12
Supplement: pone.0170247.s001.pdf [file pone.0170247.s001.pdf]

| PATNO                                            | GENDER | AGE | NHSS | HYPERTON<br>1=no/2=yes | DIABETES<br>1=no/2=yes | AF<br>1=no/2=yes | HLP<br>1=no/2=yes | SMOKE<br>1=no/2=yes | PRIOR STROKE<br>1=no/2=yes | KHK<br>1=no/2=yes | ONSET-TO-DOOR<br>1<=3hr<br>3>3-4.5hr<br>4.6-24hr<br>5>24hr or unknown | SITE OF OCCLUSION | ONTOVIT<br>minutes | ONSET TO EVT<br>minutes | RECANAL INFAECT SIZE<br>TICI<br>5=unknown | ICH          | SYMPTOMATIC ICH | mRS90 | TOAST<br>1=atherosclerotic<br>2=cardioembolic<br>3=small vessel<br>4=other determined etiology<br>5=undetermined etiology | OCCLUSION DETECTED BY | ECD           | TCD | CTA | MRA |   |
|--------------------------------------------------|--------|-----|------|------------------------|------------------------|------------------|-------------------|---------------------|----------------------------|-------------------|-----------------------------------------------------------------------|-------------------|--------------------|-------------------------|-------------------------------------------|--------------|-----------------|-------|---------------------------------------------------------------------------------------------------------------------------|-----------------------|---------------|-----|-----|-----|---|
| <b>ICA occlusion without IVT/EVT (21 Pat)</b>    |        |     |      |                        |                        |                  |                   |                     |                            |                   |                                                                       |                   |                    |                         |                                           |              |                 |       |                                                                                                                           |                       |               |     |     |     |   |
| 1                                                | 2      | 87  | 21   | 2                      | 1                      | 1                | 1                 | 1                   | 1                          | 1                 | 1                                                                     | 4 ICA             |                    |                         | 0 > 1/3 MCA                               | no           |                 | 6     | 5                                                                                                                         |                       |               |     | X   |     |   |
| 2                                                | 1      | 57  | 3    | 2                      | 1                      | 1                | 2                 | 2                   | 1                          | 2                 | 1                                                                     | 1 ICA             |                    |                         | 0 < 1/3 MCA                               | no           |                 | 2     | 1                                                                                                                         | X                     |               |     |     | X   |   |
| 3                                                | 2      | 75  | 5    | 2                      | 2                      | 1                | 2                 | 1                   | 1                          | 1                 | 4 ICA                                                                 |                   |                    | 5 < 1/3 MCA             | no                                        |              | 2               | 1     | X                                                                                                                         |                       |               |     |     | X   |   |
| 4                                                | 1      | 62  | 4    | 2                      | 1                      | 1                | 2                 | 1                   | 2                          | 2                 | 5 ICA                                                                 |                   |                    | 5 < 1/3 MCA             | no                                        |              | 1               | 1     | X                                                                                                                         |                       |               |     |     | X   |   |
| 5                                                | 1      | 54  | 3    | 2                      | 1                      | 1                | 2                 | 2                   | 1                          | 1                 | 5 ICA                                                                 |                   |                    | 5 < 1/3 MCA             | no                                        |              | 1               | 1     | X                                                                                                                         |                       |               |     |     | X   |   |
| 6                                                | 1      | 73  | 0    | 2                      | 2                      | 1                | 2                 | 1                   | 2                          | 2                 | 0 < 1/3 MCA                                                           | no                |                    | 2                       | 1                                         | 0 < 1/3 MCA  | no              | 2     | 1                                                                                                                         | X                     |               |     | X   | X   |   |
| 7                                                | 2      | 85  | 5    | 2                      | 2                      | 2                | 2                 | 1                   | 2                          | 1                 | 5 ICA                                                                 |                   |                    | 4                       | 4                                         | 5 < 1/3 MCA  | no              | 5     | 5                                                                                                                         | X                     |               |     | X   | X   |   |
| 8                                                | 1      | 62  | 27   | 2                      | 2                      | 1                | 2                 | 2                   | 1                          | 2                 | 3 ICA                                                                 |                   |                    | 1                       | 1                                         | 5 > 1/3 MCA  | no              | 1     | 1                                                                                                                         | X                     |               |     |     | X   |   |
| 9                                                | 1      | 66  | 0    | 2                      | 2                      | 1                | 1                 | 2                   | 1                          | 2                 | 4 ICA                                                                 |                   |                    | 1                       | 2                                         | 0 < 1/3 MCA  | no              | 0     | 1                                                                                                                         | X                     |               |     |     | X   |   |
| 10                                               | 2      | 75  | 9    | 2                      | 1                      | 1                | 1                 | 1                   | 1                          | 1                 | 4 ICA                                                                 |                   |                    | 1                       | 1                                         | 5 > 1/3 MCA  | no              | 4     | 1                                                                                                                         | X                     |               |     |     | X   |   |
| 11                                               | 1      | 71  | 3    | 2                      | 1                      | 2                | 2                 | 2                   | 1                          | 1                 | 4 ICA                                                                 |                   |                    | 2                       | 2                                         | 2a < 1/3 MCA | no              | 2     | 2                                                                                                                         | X                     |               |     | X   |     |   |
| 12                                               | 1      | 55  | 8    | 2                      | 2                      | 1                | 2                 | 2                   | 1                          | 1                 | 5 ICA                                                                 |                   |                    | 1                       | 1                                         | 5 < 1/3 MCA  | no              | 4     | 5                                                                                                                         | X                     |               |     | X   |     |   |
| 13                                               | 1      | 61  | 4    | 2                      | 2                      | 1                | 2                 | 1                   | 2                          | 1                 | 5 ICA                                                                 |                   |                    | 1                       | 1                                         | 5 < 1/3 MCA  | no              | 1     | 1                                                                                                                         | X                     |               |     |     | X   |   |
| 14                                               | 2      | 75  | 4    | 2                      | 1                      | 1                | 2                 | 1                   | 2                          | 1                 | 5 ICA                                                                 |                   |                    | 1                       | 2                                         | 0 < 1/3 MCA  | no              | 2     | 1                                                                                                                         |                       |               |     | X   | X   |   |
| 15                                               | 1      | 74  | 2    | 2                      | 1                      | 1                | 2                 | 1                   | 2                          | 1                 | 5 ICA                                                                 |                   |                    | 1                       | 1                                         | 5 < 1/3 MCA  | no              | 1     | 1                                                                                                                         |                       | X             |     |     |     |   |
| 16                                               | 2      | 46  | 10   | 1                      | 1                      | 1                | 1                 | 2                   | 1                          | 1                 | 5 ICA                                                                 |                   |                    | 1                       | 1                                         | 5 > 1/3 MCA  | no              | 4     | 5                                                                                                                         | X                     |               |     | X   |     |   |
| 17                                               | 1      | 77  | 4    | 2                      | 1                      | 2                | 2                 | 1                   | 2                          | 1                 | 1 ICA                                                                 |                   |                    | 2                       | 2                                         | 5 < 1/3 MCA  | no              | 2     | 2                                                                                                                         | X                     |               |     |     | X   |   |
| 18                                               | 1      | 55  | 13   | 2                      | 1                      | 1                | 1                 | 2                   | 1                          | 2                 | 5 ICA                                                                 |                   |                    | 1                       | 2                                         | 5 > 1/3 MCA  | HT1             | 3     | 1                                                                                                                         | X                     |               |     | X   |     |   |
| 19                                               | 2      | 67  | 3    | 2                      | 1                      | 1                | 2                 | 2                   | 1                          | 1                 | 5 ICA                                                                 |                   |                    | 1                       | 1                                         | 5 < 1/3 MCA  | no              | 3     | 1                                                                                                                         | X                     |               |     | X   | X   |   |
| 20                                               | 1      | 49  | 6    | 2                      | 1                      | 1                | 2                 | 2                   | 1                          | 1                 | 4 ICA                                                                 |                   |                    | 1                       | 1                                         | 5 < 1/3 MCA  | no              | 4     | 1                                                                                                                         | 4, dissection         | X             |     | X   | X   |   |
| 21                                               | 2      | 83  | 5    | 2                      | 1                      | 2                | 2                 | 1                   | 2                          | 1                 | 5 ICA                                                                 |                   |                    | 1                       | 1                                         | 5 < 1/3 MCA  | no              | 1     | 2                                                                                                                         | X                     |               |     |     | X   |   |
| <b>ICA-MCA occlusion without IVT/EVT (6 Pat)</b> |        |     |      |                        |                        |                  |                   |                     |                            |                   |                                                                       |                   |                    |                         |                                           |              |                 |       |                                                                                                                           |                       |               |     |     |     |   |
| 22                                               | 2      | 88  | 19   | 2                      | 1                      | 2                | 1                 | 1                   | 1                          | 1                 | 4 ICA + M1                                                            |                   |                    | 1                       | 1                                         | 0 > 1/3 MCA  | no              | 6     | 2                                                                                                                         | X                     |               |     |     | X   |   |
| 23                                               | 1      | 55  | 22   | 2                      | 2                      | 1                | 2                 | 1                   | 1                          | 1                 | 3 ICA + M1                                                            |                   |                    | 1                       | 1                                         | 5 > 1/3 MCA  | no              | 5     | 5                                                                                                                         | X                     |               |     | X   |     |   |
| 24                                               | 2      | 85  | 21   | 2                      | 1                      | 1                | 2                 | 2                   | 1                          | 1                 | 5 > 1/3 MCA                                                           |                   |                    | 1                       | 1                                         | 5 > 1/3 MCA  | no              | 6     | 6                                                                                                                         | X                     |               |     |     | X   |   |
| 25                                               | 1      | 69  | 14   | 2                      | 2                      | 1                | 1                 | 1                   | 1                          | 1                 | 5 ICA + M1                                                            |                   |                    | 1                       | 2                                         | 0 > 1/3 MCA  | HT1             | no    | 4                                                                                                                         | 1                     | X             |     |     | X   |   |
| 26                                               | 1      | 43  | 11   | 1                      | 1                      | 1                | 2                 | 2                   | 1                          | 1                 | 4 ICA + M1                                                            |                   |                    | 1                       | 1                                         | 5 > 1/3 MCA  | no              | 5     | 4                                                                                                                         | 4, dissection         | X             |     |     | X   |   |
| 27                                               | 1      | 55  | 12   | 2                      | 2                      | 1                | 1                 | 1                   | 1                          | 2                 | 1                                                                     | 5 ICA + M1        |                    |                         | 1                                         | 1            | 0 > 1/3 MCA     | no    | 4                                                                                                                         | 5                     | 4, dissection | X   |     |     | X |
| <b>ICA occlusion IVT (10 Pat)</b>                |        |     |      |                        |                        |                  |                   |                     |                            |                   |                                                                       |                   |                    |                         |                                           |              |                 |       |                                                                                                                           |                       |               |     |     |     |   |
| 28                                               | 2      | 43  | 18   | 2                      | 2                      | 1                | 2                 | 1                   | 1                          | 1                 | 1 ICA                                                                 |                   |                    | 84                      | 1                                         | 0 < 1/3 MCA  | no              | 2     | 4, dissection                                                                                                             | X                     |               |     | X   | X   |   |
| 29                                               | 2      | 76  | 9    | 2                      | 2                      | 1                | 1                 | 1                   | 1                          | 2                 | 1 ICA + M2                                                            |                   |                    | 270                     | 1                                         | 0 < 1/3 MCA  | no              | 4     | 1                                                                                                                         | X                     |               |     | X   | X   |   |
| 30                                               | 2      | 84  | 19   | 2                      | 1                      | 2                | 1                 | 1                   | 2                          | 1                 | 1 ICA                                                                 |                   |                    | 85                      | 1                                         | 0 > 1/3 MCA  | no              | 4     | 2                                                                                                                         | X                     |               |     | X   |     |   |
| 31                                               | 1      | 76  | 9    | 2                      | 1                      | 2                | 2                 | 1                   | 1                          | 1                 | 1 ICA                                                                 |                   |                    | 156                     | 1                                         | 0 < 1/3 MCA  | no              | 2     | 4                                                                                                                         | X                     |               |     | X   |     |   |
| 32                                               | 2      | 85  | 12   | 2                      | 1                      | 2                | 2                 | 1                   | 1                          | 1                 | 1 ICA                                                                 |                   |                    | 225                     | 1                                         | 0 > 1/3 MCA  | no              | 6     | 2                                                                                                                         | X                     |               |     | X   |     |   |
| 33                                               | 1      | 74  | 3    | 2                      | 1                      | 1                | 2                 | 1                   | 1                          | 2                 | 1 ICA + M2                                                            |                   |                    | 75                      | 1                                         | 0 < 1/3 MCA  | no              | 1     | 1                                                                                                                         | X                     |               |     | X   |     |   |
| 34                                               | 2      | 56  | 13   | 2                      | 1                      | 1                | 2                 | 2                   | 1                          | 1                 | 2 ICA                                                                 |                   |                    | 25                      | 1                                         | 0 > 1/3 MCA  | PH1             | 3     | 1                                                                                                                         | X                     |               |     |     | X   |   |
| 35                                               | 1      | 76  | 21   | 2                      | 1                      | 1                | 2                 | 1                   | 1                          | 1                 | 1 ICA                                                                 |                   |                    | 70                      | 1                                         | 0 > 1/3 MCA  | no              | 6     | 6                                                                                                                         | X                     |               |     |     | X   |   |
| 36                                               | 1      | 76  | 5    | 2                      | 1                      | 1                | 1                 | 1                   | 1                          | 2                 | 1 ICA                                                                 |                   |                    | 90                      | 1                                         | 0 < 1/3 MCA  | no              | 0     | 1                                                                                                                         | X                     |               |     | X   |     |   |
| 37                                               | 1      | 86  | 15   | 2                      | 1                      | 2                | 1                 | 1                   | 1                          | 1                 | 2 ICA                                                                 |                   |                    | 270                     | 1                                         | 1 < 1/3 MCA  | no              | 5     | 2                                                                                                                         | X                     |               |     | X   |     |   |
| <b>ICA occlusion IVT/EVT (12 Pat)</b>            |        |     |      |                        |                        |                  |                   |                     |                            |                   |                                                                       |                   |                    |                         |                                           |              |                 |       |                                                                                                                           |                       |               |     |     |     |   |
| 38                                               | 1      | 64  | 17   | 1                      | 1                      | 1                | 1                 | 2                   | 1                          | 1                 | 2 ICA                                                                 |                   |                    | 244                     | 330                                       | 3 > 1/3 MCA  | PH2             | yes   | 4                                                                                                                         | 1                     | X             |     |     | X   |   |
| 39                                               | 1      | 58  | 20   | 2                      | 1                      | 1                | 1                 | 1                   | 1                          | 1                 | 1 ICA                                                                 |                   |                    | 75                      | 139                                       | 3 < 1/3 MCA  | no              | 2     | 4, dissection                                                                                                             | X                     |               |     | X   |     |   |
| 40                                               | 1      | 44  | 2    | 2                      | 2                      | 1                | 2                 | 2                   | 2                          | 2                 | 1 ICA                                                                 |                   |                    | 85                      | 329                                       | 3 < 1/3 MCA  | no              | 1     | 4, dissection                                                                                                             | X                     |               |     | X   |     |   |
| 41                                               | 1      | 69  | 13   | 2                      | 1                      | 1                | 1                 | 1                   | 1                          | 1                 | 2 ICA                                                                 |                   |                    | 90                      | 164                                       | 2a > 1/3 MCA | HT1             | no    | 5                                                                                                                         | 5                     | X             |     |     | X   |   |
| 42                                               | 2      | 93  | 12   | 2                      | 1                      | 1                | 1                 | 1                   | 1                          | 1                 | 1 ICA + M2                                                            |                   |                    | 224                     | 265                                       | 3 < 1/3 MCA  | no              | 4     | 4                                                                                                                         | X                     |               |     |     | X   |   |
| 43                                               | 1      | 75  | 11   | 2                      | 2                      | 1                | 2                 | 1                   | 1                          | 1                 | 2 ICA                                                                 |                   |                    | 99                      | 191                                       | 3 < 1/3 MCA  | no              | 3     | 1                                                                                                                         | X                     |               |     | X   |     |   |
| 44                                               | 1      | 57  | 9    | 2                      | 2                      | 2                | 2                 | 1                   | 1                          | 1                 | 1 ICA + M2                                                            |                   |                    | 166                     | 259                                       | 3 > 1/3 MCA  | PH1             | yes   | 6                                                                                                                         | 2                     | X             |     |     | X   |   |
| 45                                               | 1      | 76  | 11   | 2                      | 1                      | 1                | 2                 | 1                   | 1                          | 2                 | 1 ICA                                                                 |                   |                    | 75                      | 160                                       | 3 < 1/3 MCA  | no              | 0     | 2                                                                                                                         | X                     |               |     | X   |     |   |
| 46                                               | 2      | 63  | 2    | 2                      | 1                      | 1                | 2                 | 2                   | 2                          | 1                 | 1 ICA                                                                 |                   |                    | 63                      | 154                                       | 3 < 1/3 MCA  | no              | 1     | 1                                                                                                                         | X                     |               | X   |     | X   |   |
| 47                                               | 2      | 62  | 16   | 1                      | 1                      | 1                | 1                 | 1                   | 1                          | 1                 | 1 ICA                                                                 |                   |                    | 68                      | 111                                       | 3 > 1/3 MCA  | PH2             | yes   | 6                                                                                                                         | 5                     | X             |     |     | X   |   |
| 48                                               | 1      | 77  | 14   | 2                      | 1                      | 2                | 2                 | 1                   | 1                          | 1                 | 1 ICA                                                                 |                   |                    | 60                      | 120                                       | 3 > 1/3 MCA  | PH2             | no    | 4                                                                                                                         | 1                     | X             |     |     | X   |   |
| 49                                               | 2      | 77  | 26   | 2                      | 1                      | 2                | 2                 | 2                   | 2                          | 1                 | 1 ICA                                                                 |                   |                    | 52                      | 124                                       | 3 < 1/3 MCA  | no              | 0     | 2                                                                                                                         | X                     |               |     | X   | X   |   |
| <b>ICA-MCA occlusion IVT (13 Pat)</b>            |        |     |      |                        |                        |                  |                   |                     |                            |                   |                                                                       |                   |                    |                         |                                           |              |                 |       |                                                                                                                           |                       |               |     |     |     |   |
| 50                                               | 2      | 98  | 17   | 2                      | 1                      | 2                | 2                 | 1                   | 2                          | 1                 | 1 ICA + M1                                                            |                   |                    | 130                     | 1                                         | 1 > 1/3 MCA  | no              | 6     | 2                                                                                                                         | X                     |               |     | X   |     |   |
| 51                                               | 2      | 74  | 13   | 1                      | 1                      | 1                | 1                 | 1                   | 1                          | 2                 | 1 ICA + M1                                                            |                   |                    | 120                     | 1                                         | 3 > 1/3 MCA  | no              | 5     | 1                                                                                                                         | X                     |               |     | X   |     |   |
| 52                                               | 2      | 95  | 17   | 2                      | 1                      | 2                | 2                 | 1                   | 1                          | 1                 | 2 ICA + M1                                                            |                   |                    | 115                     | 1                                         | 0 > 1/3 MCA  | HT1             | no    | 2                                                                                                                         | 2                     | X             |     |     | X   |   |
| 53                                               | 2      | 93  | 12   | 2                      | 1                      | 2                | 2                 | 1                   | 1                          | 1                 | 1 ICA + M1                                                            |                   |                    | 180                     | 1                                         | 3 < 1/3 MCA  | no              | 1     | 1                                                                                                                         | X                     |               |     | X   |     |   |
| 54                                               | 1      | 52  | 18   | 2                      | 1                      | 1                | 1                 | 2                   | 1                          | 1                 | 1 ICA + Carotid T                                                     |                   |                    | 68                      | 1                                         | 1 > 1/3 MCA  | no              | 5     | 1                                                                                                                         | X                     |               |     |     | X   |   |
| 55                                               | 1      | 87  | 17   | 2                      | 1                      | 2                | 2                 | 2                   | 1                          | 2                 | 1 ICA + Carotid T                                                     |                   |                    | 75                      | 1                                         | 0 > 1/3 MCA  | no              | 5     | 5                                                                                                                         | X                     |               |     | X   |     |   |
| 56                                               | 2      | 82  | 26   | 2                      | 1                      | 2                | 2                 | 1                   | 1                          | 1                 | 1 ICA + Carotid T                                                     |                   |                    | 123                     | 1                                         | 5 > 1/3 MCA  | no              | 6     | 2                                                                                                                         | X                     |               |     | X   |     |   |
| 57                                               | 1      | 64  | 16   | 2                      | 2                      | 2                | 2                 | 1                   | 2                          | 1                 | 1 ICA + Carotid T                                                     |                   |                    | 93                      | 1                                         | 0 > 1/3 MCA  | no              | 6     | 5                                                                                                                         | X                     |               |     | X   |     |   |
| 58                                               | 2      | 85  | 19   | 2                      | 1                      | 2                | 2                 | 1                   | 1                          | 2                 | 1 ICA + M1                                                            |                   |                    | 105                     | 1                                         | 2a > 1/3 MCA | no              | 6     | 2                                                                                                                         | X                     |               |     | X   |     |   |
| 59                                               | 1      | 77  | 9    | 2                      | 1                      | 1                | 2                 | 1                   | 1                          | 2                 | 1 ICA + M1                                                            |                   |                    | 109                     | 1                                         | 3 > 1/3 MCA  | no              | 5     | 1                                                                                                                         | X                     |               |     | X   |     |   |
| 60                                               | 1      | 87  | 18   | 2                      | 1                      | 1                | 1                 | 1                   | 1                          | 1                 | 2 ICA + M1                                                            |                   |                    | 190                     | 1                                         | 5 > 1/3 MCA  | PH1             | yes   | 6                                                                                                                         | 5                     | X             |     |     | X   | X |
| 61                                               | 2      | 86  | 23   | 1                      | 2                      | 1                | 1                 | 2                   | 1                          | 1                 | 2 ICA + M1                                                            |                   |                    | 125                     | 1                                         | 5 > 1/3 MCA  | no              | 6     | 6                                                                                                                         | X                     |               |     | X   |     |   |
| 62                                               | 2      | 89  | 16   | 2                      | 1                      | 2                | 1                 | 1                   | 1                          | 1                 | 1 ICA + M1                                                            |                   |                    | 110                     | 1                                         | 0 > 1/3 MCA  | no              | 6     | 2                                                                                                                         | X                     |               |     | X   |     |   |
| <b>ICA-MCA occlusion IVT/EVT (16 Pat)</b>        |        |     |      |                        |                        |                  |                   |                     |                            |                   |                                                                       |                   |                    |                         |                                           |              |                 |       |                                                                                                                           |                       |               |     |     |     |   |
| 63                                               | 1      | 86  | 15   | 2                      | 1                      | 1                | 1                 | 1                   | 1                          | 1                 | 2 ICA + Carotid T                                                     |                   |                    | 90                      | 120                                       | 2b < 1/3 MCA | no              | 2     | 1                                                                                                                         | X                     |               |     |     | X   |   |
| 64                                               | 1      | 77  | 15   | 1                      | 1                      | 1                | 1                 | 1                   | 1                          | 1                 | 1 ICA + M1                                                            |                   |                    | 33                      | 74                                        | 2b > 1/3 MCA | HT1             | no    | 3                                                                                                                         | 1                     | X             |     |     | X   |   |
| 65                                               | 2      | 81  | 16   | 2                      | 1                      | 2                | 1                 | 1                   | 1                          | 1                 | 1 ICA + Carotid T                                                     |                   |                    | 32                      | 195                                       | 3 > 1/3 MCA  | no              | 6     | 2                                                                                                                         | X                     |               |     | X   |     |   |
| 66                                               | 1      | 69  | 15   | 1                      | 1                      | 2                | 1                 | 1                   | 1                          | 1                 | 2 ICA + Carotid T                                                     |                   |                    | 260                     | 330                                       | 2a < 1/3 MCA | no              | 5     | 2                                                                                                                         | X                     |               |     | X   |     |   |
| 67                                               | 2      | 61  | 21   | 2                      | 1                      | 1                | 2                 | 2                   | 1                          | 1                 | 2 ICA + Carotid T                                                     |                   |                    | 85                      | 176                                       | 0 < 1/3 MCA  | PH2             | yes   | 3                                                                                                                         | 5                     | X             |     |     | X   |   |
| 68                                               | 2      | 71  | 5    | 2                      | 1                      | 1                | 2                 | 1                   | 1                          | 1                 | 1 ICA + Carotid T                                                     |                   |                    | 150                     | 206                                       | 3 > 1/3 MCA  | PH2             | yes   | 6                                                                                                                         | 6                     | X             |     |     | X   |   |
| 69                                               | 2      | 51  | 18   | 2                      | 2                      | 1                | 2                 | 1                   | 1                          | 1                 | 1 ICA + Carotid T                                                     |                   |                    | 105                     | 251                                       | 2a > 1/3 MCA | PH2             | yes   | 6                                                                                                                         | 2                     | X             |     |     | X   |   |
| 70                                               | 2      | 75  | 25   | 2                      | 1                      | 2                | 1                 | 1                   | 1                          | 1                 | 1 ICA + M1                                                            |                   |                    | 125                     | 245                                       | 2a > 1/3 MCA | HT1             | yes   | 3                                                                                                                         | 2                     | X             |     |     | X   |   |
| 71                                               | 1      | 73  | 20   | 3                      | 1                      | 2                | 1                 | 1                   | 1                          | 2                 | 1 ICA + Carotid T                                                     |                   |                    | 120                     | 177                                       | 3 > 1/3 MCA  | PH1             | yes   | 6                                                                                                                         | 2                     | X             |     |     | X   |   |
| 72                                               | 2      | 70  | 13   | 2                      | 1                      | 1                | 1                 | 1                   | 1                          | 1                 | 2 ICA + M1                                                            |                   |                    | 45                      | 101                                       | 2 > 1/3 MCA  | PH1             | yes   | 6                                                                                                                         | 1                     | X             |     |     | X   |   |
| 73                                               | 2      | 84  | 9    | 2                      | 1                      | 2                | 2                 | 1                   | 1                          | 1                 | 1 ICA + M1                                                            |                   |                    | 210                     | 260                                       | 0 < 1/3 MCA  | no              | 5     |                                                                                                                           |                       |               |     |     |     |   |
